# Supplementary material for: Multi-year black carbon observations and modeling close to the largest gas flaring and wildfire regions (Western Siberian Arctic)
Source: Copernicus journal article supplement (doi:10.5194/egusphere-2024-3124), 2024-11-07
Supplement: Supplementary file 1 [file egusphere-2024-3124-supplement.pdf]

Supplementary Information for

**Multi-year black carbon observations and modeling close to the  
largest gas flaring and wildfire regions (Western Siberian  
Arctic)**

**Olga B. Popovicheva<sup>1</sup>, Marina A. Chichaeva<sup>2</sup>, Nikolaos Evangeliou<sup>3</sup>, Sabine  
Eckhardt<sup>3</sup>, Evangelia Diapouli<sup>4</sup>, and Nikolay S. Kasimov<sup>2</sup>**

<sup>1</sup>SINP, Lomonosov Moscow State University, 119991 Moscow, Russia

<sup>2</sup>Faculty of Geography, Lomonosov Moscow State University, 119991 Moscow, Russia

<sup>3</sup>NILU, Department for Atmospheric & Climate Research (ATMOS), 2007 Kjeller,  
Norway

<sup>4</sup>ERL, Institute of Nuclear and Radiological Science & Technology, Energy & Safety,  
NCSR Demokritos, 15341 Attiki, Athens, Greece

\* Corresponding author: N. Evangeliou ([Nikolaos.Evangeliou@nilu.no](mailto:Nikolaos.Evangeliou@nilu.no))

## Supplementary Figures

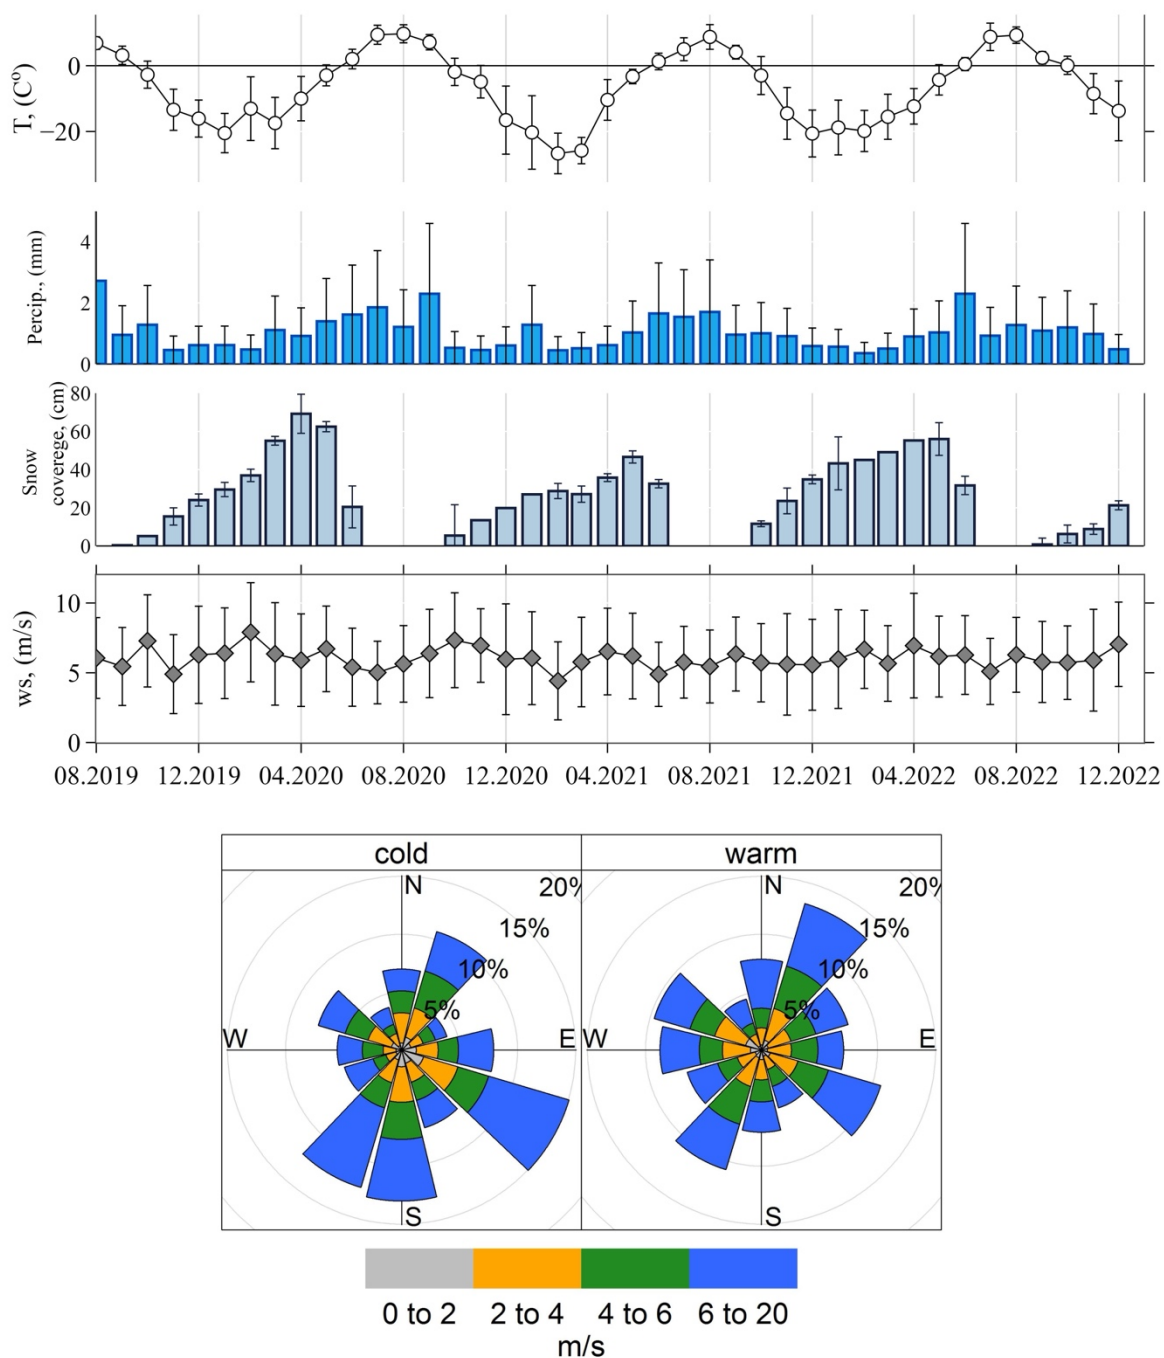

**Figure S 1.** (top) Monthly mean local meteorological variables: temperature, precipitation, snow coverage, and wind speed from 10 August 2019 to 31 December 2022 in the Bely Island. Standard deviations are shown with whiskers. Date format is mm.YYYY. (bottom) Wind roses for the cold and warm periods showing the prevailing wind circulation.

## ANTHROPOGENIC EMISSIONS OF BC FROM ECLIPSEv6

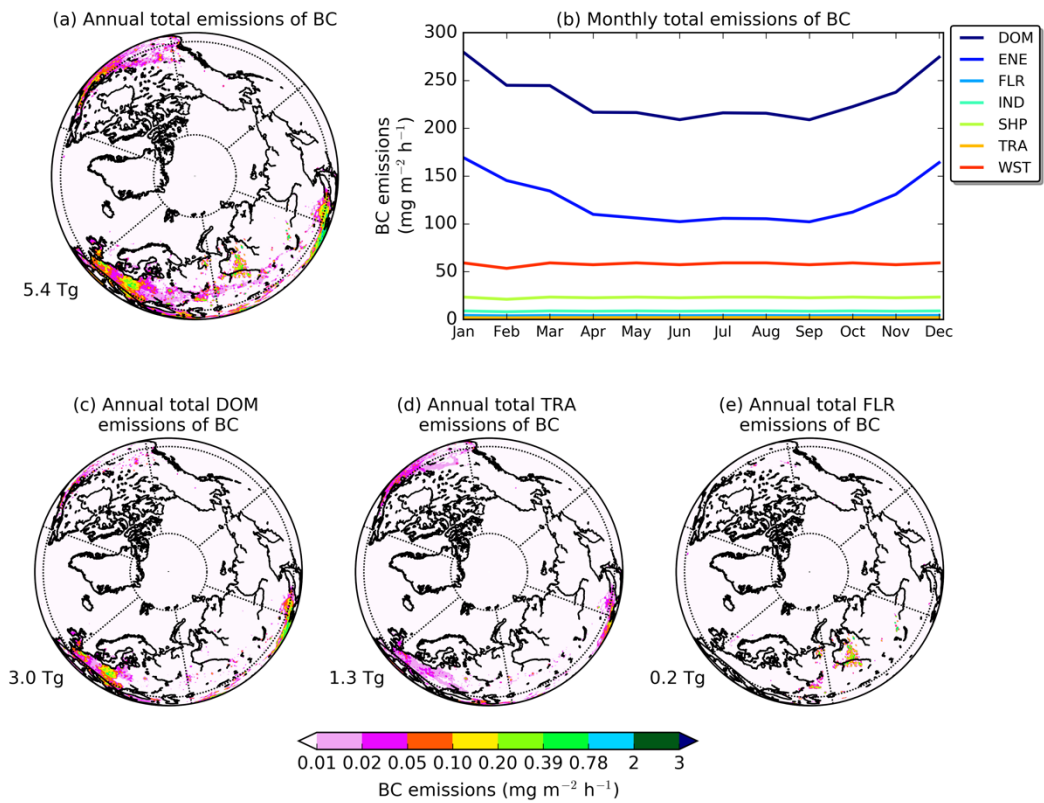

**Figure S 2.** (a) Annual total and (b) monthly anthropogenic BC emissions, (c) annual total domestic (DOM), (d) traffic (TRA), and (e) gas flaring (FLR) emissions of BC from ECLIPSEv6 emission inventory.

### BIOMASS BURNING EMISSIONS OF BC FROM CAMS GFAS

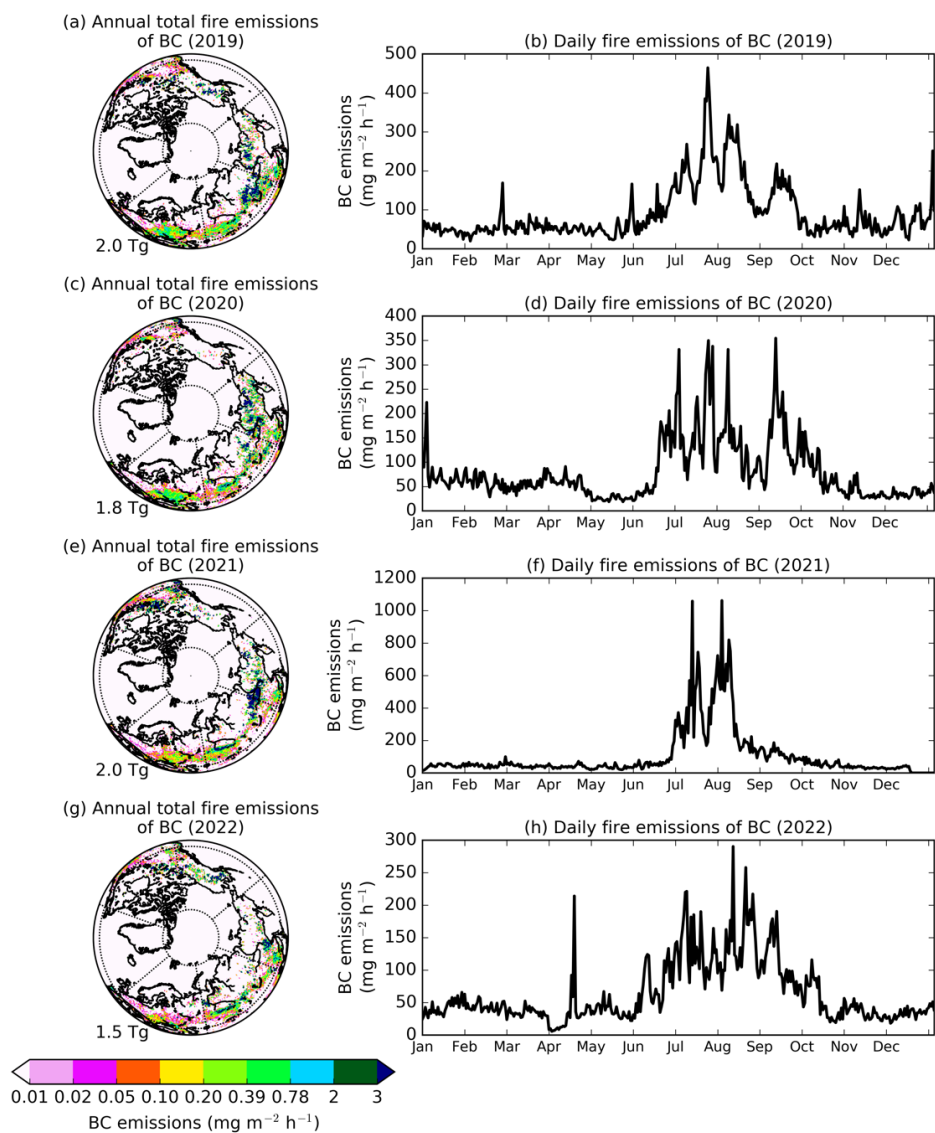

**Figure S 3.** Annual total and daily fire emissions of BC from the CAMS Global Fire Assimilation System (GFAS).

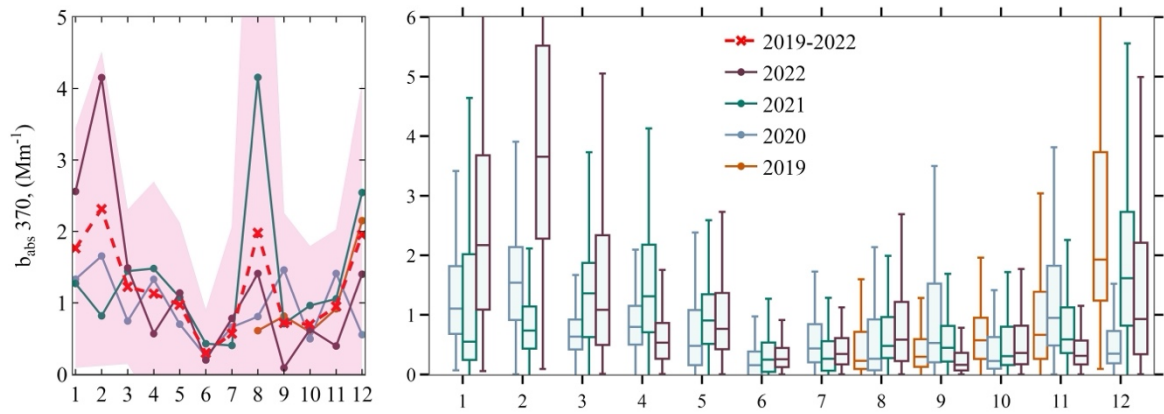

**Figure S 4.** Monthly means (left) and box-whisker plot (right) of  $b_{\text{abs}}(370)$ . The 25<sup>th</sup>, 50<sup>th</sup>, and 75<sup>th</sup> percentiles are shown with boxes, while whiskers extend  $\pm 1.5$  times the interquartile range.

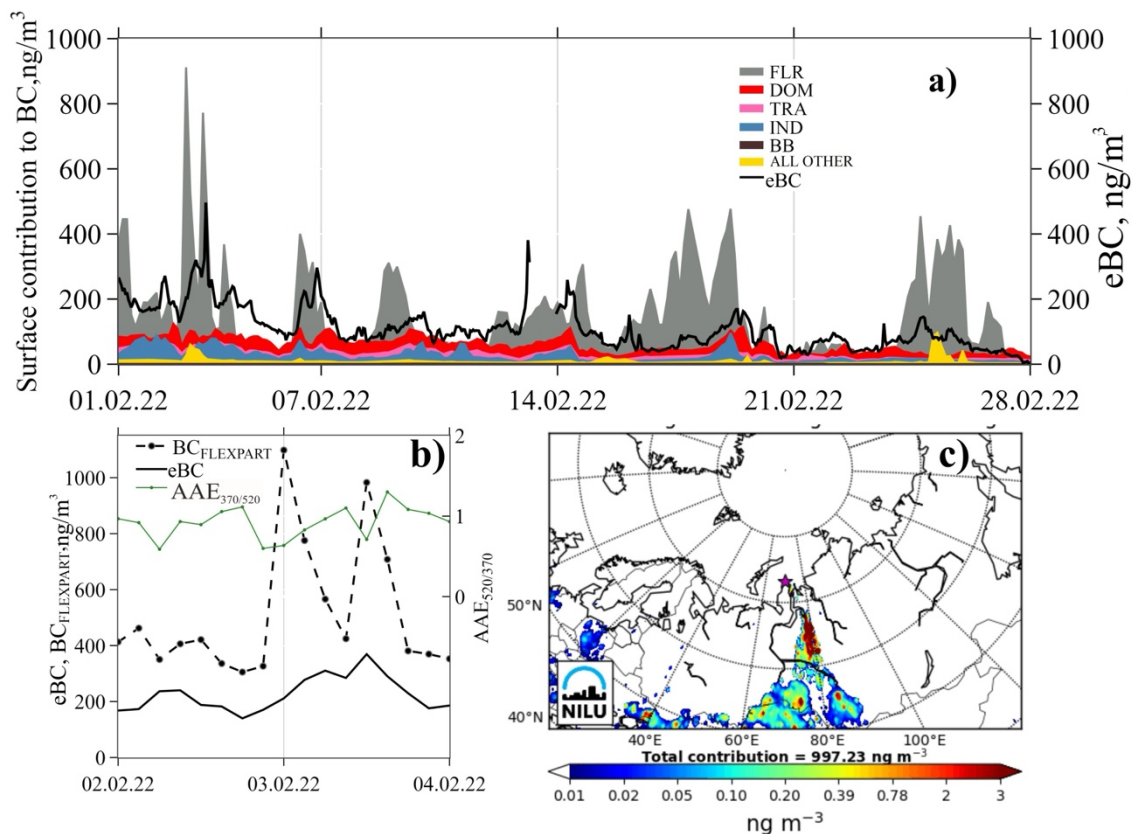

**Figure S 5.** (a) Time series of 3-hourly eBC concentrations and contributions from different emission source types to the BC surface concentrations during February 2021. (b) Episode of highest eBC and simulated BC, AAE<sub>370/520</sub>. (c) Spatial distribution of anthropogenic contribution to surface BC to the Island Bely station on 5 August 2021.

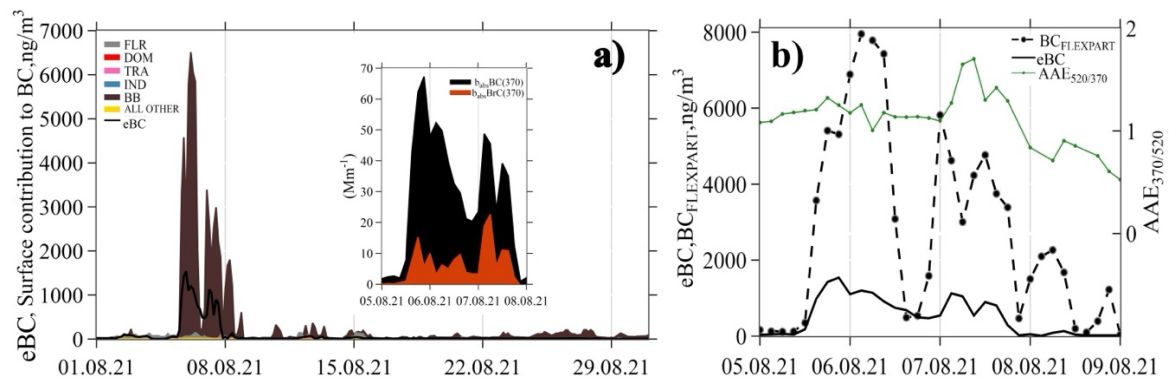

**Figure S 6.** (a) 3-hourly surface BC concentrations simulated with FLEXPART coupled to ECLIPSEv6-GFAS during August 2021. Contribution from different emission source types to the BC surface concentrations. (b) eBC concentrations observed at Bely and the respective AAE. The insert shows  $b_{\text{absBC}}(370)$  and  $b_{\text{absBrC}}(370)$ .

## Supplementary Tables

**Table S 1.** Annual average statistics (mean, standard deviation, minimum, maximum) of meteorological parameters from August 2019 to December 2022 for the Bely Island.

|                   |                   | mean | sd   | min   | max  |
|-------------------|-------------------|------|------|-------|------|
| °C                | Temperature       | -6,3 | 12,0 | -39,4 | 23,1 |
| m s <sup>-1</sup> | Wind speed        | 6,0  | 3,1  | 0,0   | 20,0 |
| mm Hg             | Pressure          | 757  | 10   | 721   | 788  |
| %                 | Relative humidity | 87   | 8    | 4     | 100  |
| mm                | Precipitation     | 1,0  | 1,6  | 0,1   | 22   |
| cm                | Snow coverage     | 32   | 18   | 0,4   | 73   |



**Table S 2 . Annual and monthly eBC, AAE<sub>370/520</sub> and AAE<sub>370/950</sub> statistics.**

| period | eBC , ng/m <sup>3</sup> |     |        | AAE <sub>(370/520)</sub> |     |        | AAE <sub>(370/950)</sub> |     |        |
|--------|-------------------------|-----|--------|--------------------------|-----|--------|--------------------------|-----|--------|
| year   | mean                    | sd  | median | mean                     | sd  | median | mean                     | sd  | median |
| 2019   | 33                      | 44  | 16     | 1.0                      | 1.5 | 0.9    | 0.9                      | 0.6 | 0.9    |
| 2020   | 24                      | 29  | 15     | 1.0                      | 1.6 | 1.0    | 1.0                      | 0.6 | 1.0    |
| 2021   | 33                      | 85  | 14     | 0.9                      | 1.4 | 0.8    | 0.9                      | 0.6 | 0.9    |
| 2022   | 32                      | 48  | 12     | 1.3                      | 1.6 | 1.0    | 1.0                      | 0.6 | 1.0    |
| month  | 2019                    |     |        |                          |     |        |                          |     |        |
| 8      | 10                      | 12  | 5      | 1.5                      | 1.8 | 1.4    | 1.1                      | 0.7 | 1.1    |
| 9      | 14                      | 19  | 7      | 1.2                      | 1.7 | 1.1    | 1.0                      | 0.7 | 1.0    |
| 10     | 19                      | 16  | 14     | 0.8                      | 1.2 | 0.8    | 0.8                      | 0.5 | 0.8    |
| 11     | 29                      | 30  | 19     | 0.8                      | 1.4 | 0.7    | 0.9                      | 0.6 | 0.8    |
| 12     | 81                      | 64  | 58     | 0.7                      | 0.8 | 0.7    | 0.9                      | 0.3 | 0.9    |
|        | 2020                    |     |        |                          |     |        |                          |     |        |
| 1      | 35                      | 25  | 30     | 0.8                      | 0.9 | 0.9    | 0.9                      | 0.4 | 1.0    |
| 2      | 41                      | 24  | 39     | 0.9                      | 0.7 | 0.9    | 1.0                      | 0.3 | 1.0    |
| 3      | 22                      | 16  | 19     | 0.8                      | 1.1 | 0.7    | 0.9                      | 0.5 | 0.9    |
| 4      | 31                      | 43  | 18     | 0.7                      | 1.5 | 0.7    | 0.9                      | 0.6 | 0.9    |
| 5      | 18                      | 18  | 12     | 0.9                      | 1.9 | 0.9    | 1.0                      | 0.8 | 0.9    |
| 6      | 8                       | 11  | 5      | 1.5                      | 2.4 | 1.5    | 1.1                      | 1.0 | 1.0    |
| 7      | 14                      | 14  | 9      | 1.4                      | 1.9 | 1.4    | 1.1                      | 0.7 | 1.2    |
| 8      | 19                      | 27  | 6      | 1.3                      | 2.0 | 1.3    | 1.0                      | 0.8 | 1.0    |
| 9      | 31                      | 48  | 13     | 0.9                      | 1.7 | 1.0    | 0.9                      | 0.7 | 1.0    |
| 10     | 14                      | 21  | 7      | 0.9                      | 1.7 | 0.9    | 0.9                      | 0.7 | 0.9    |
| 11     | 35                      | 29  | 27     | 1.0                      | 1.0 | 1.0    | 1.0                      | 0.4 | 1.0    |
| 12     | 15                      | 16  | 9      | 1.1                      | 1.5 | 1.1    | 0.9                      | 0.6 | 0.9    |
|        | 2021                    |     |        |                          |     |        |                          |     |        |
| 1      | 35                      | 39  | 13     | 0.8                      | 1.0 | 0.9    | 0.9                      | 0.4 | 0.9    |
| 2      | 24                      | 18  | 16     | 0.9                      | 1.1 | 0.8    | 0.9                      | 0.4 | 0.9    |
| 3      | 42                      | 33  | 38     | 0.7                      | 1.3 | 0.6    | 0.9                      | 0.5 | 0.8    |
| 4      | 35                      | 26  | 31     | 0.8                      | 1.0 | 0.8    | 1.0                      | 0.4 | 1.0    |
| 5      | 23                      | 19  | 17     | 0.9                      | 1.6 | 0.8    | 1.0                      | 0.7 | 1.0    |
| 6      | 10                      | 15  | 6      | 1.5                      | 2.2 | 1.4    | 1.1                      | 0.9 | 1.1    |
| 7      | 11                      | 16  | 7      | 1.2                      | 2.1 | 1.1    | 1.0                      | 0.8 | 0.9    |
| 8      | 83                      | 249 | 11     | 1.0                      | 1.3 | 0.9    | 0.9                      | 0.5 | 0.9    |
| 9      | 17                      | 24  | 10     | 0.9                      | 1.2 | 0.8    | 0.9                      | 0.5 | 0.9    |
| 10     | 25                      | 41  | 10     | 0.7                      | 1.1 | 0.7    | 0.7                      | 0.5 | 0.7    |
| 11     | 31                      | 34  | 17     | 0.9                      | 0.8 | 0.8    | 0.9                      | 0.4 | 0.8    |
| 12     | 64                      | 65  | 42     | 1.0                      | 0.8 | 1.0    | 1.0                      | 0.4 | 1.0    |
|        | 2022                    |     |        |                          |     |        |                          |     |        |
| 1      | 61                      | 49  | 49     | 1.0                      | 0.5 | 1.0    | 1.1                      | 0.2 | 1.1    |
| 2      | 106                     | 67  | 92     | 0.9                      | 0.2 | 0.9    | 1.0                      | 0.2 | 1.0    |
| 3      | 42                      | 39  | 29     | 0.8                      | 0.6 | 0.8    | 1.0                      | 0.3 | 0.9    |
| 4      | 14                      | 14  | 10     | 1.1                      | 1.1 | 1.1    | 1.0                      | 0.4 | 1.0    |
| 5      | 25                      | 31  | 14     | 1.3                      | 1.8 | 1.2    | 1.1                      | 0.7 | 1.1    |
| 6      | 6                       | 8   | 4      | 1.8                      | 2.4 | 1.8    | 1.2                      | 1.0 | 1.2    |
| 7      | 23                      | 78  | 5      | 1.9                      | 2.3 | 1.5    | 1.2                      | 0.9 | 1.0    |
| 8      | 28                      | 54  | 8      | 1.8                      | 2.4 | 1.3    | 1.2                      | 1.0 | 1.1    |
| 9      | 4                       | 3   | 3      | 1.8                      | 2.6 | 1.7    | 1.1                      | 1.0 | 1.0    |
| 10     | 16                      | 20  | 9      | 0.9                      | 1.3 | 0.9    | 0.9                      | 0.5 | 0.9    |
| 11     | 12                      | 13  | 8      | 1.1                      | 1.1 | 1.1    | 1.0                      | 0.5 | 1.0    |
| 12     | 37                      | 34  | 25     | 1.0                      | 0.9 | 1.0    | 1.0                      | 0.4 | 1.0    |

**Table S 3.** Monthly  $b_{\text{abcBC}}(370)$  and  $b_{\text{absBrC}}(370)$ , and  $b_{\text{absBrC}}$  contribution to total  $b_{\text{abs}}(370)$ .

| date           | $b_{\text{abcBC}}(370)$ , $\text{Mm}^{-1}$ | $b_{\text{absBrC}}(370)$ , $\text{Mm}^{-1}$ | BrC contribution (%) |
|----------------|--------------------------------------------|---------------------------------------------|----------------------|
| August 2019    | 467                                        | 9                                           | 2%                   |
| February 2020  | 1524                                       | 132                                         | 8%                   |
| April 2020     | 1286                                       | 45                                          | 3%                   |
| July 2020      | 600                                        | 49                                          | 7%                   |
| September 2020 | 1359                                       | 86                                          | 6%                   |
| November 2020  | 1308                                       | 102                                         | 7%                   |
| May 2021       | 1030                                       | 45                                          | 4%                   |
| August 2021    | 3594                                       | 556                                         | 13%                  |
| December 2021  | 2411                                       | 129                                         | 5%                   |
| January 2022   | 2289                                       | 264                                         | 10%                  |
| February 2022  | 3944                                       | 190                                         | 5%                   |
| May 2022       | 1068                                       | 69                                          | 6%                   |
| August 2022    | 1195                                       | 217                                         | 15%                  |
| December 2022  | 1370                                       | 28                                          | 2%                   |

**Table S 4.** Annually average mean contributions from age spectrum, regions and source sectors for 2019-2022 years, cold and warm periods.

| mean contributions to BC | entire period | warm period | cold period |
|--------------------------|---------------|-------------|-------------|
| age spectrum             |               |             |             |
| 1- 3 days                | 31%           | 24%         | 33%         |
| 3-6 days                 | 22%           | 19%         | 24%         |
| 6 - 9 days               | 16%           | 25%         | 12%         |
| 9 - 18 days              | 18%           | 16%         | 19%         |
| 18 - 30 days             | 13%           | 16%         | 12%         |
| Regions                  |               |             |             |
| Asia                     | 7%            | 2%          | 8%          |
| Europe                   | 11%           | 6%          | 13%         |
| Northern America         | 4%            | 8%          | 2%          |
| EUrus/Siberia/Far East   | 77%           | 82%         | 74%         |
| Other                    | 1%            | 2%          | 2%          |
| source sectors           |               |             |             |
| BB                       | 3%            | 48%         | 2%          |
| DOM                      | 14%           | 5%          | 18%         |
| FLR                      | 50%           | 32%         | 59%         |
| IND                      | 6%            | 4%          | 7%          |
| TRA                      | 9%            | 7%          | 10%         |
| Other                    | 17%           | 3%          | 3%          |

## Case study

The section shows the approach used to identify the event is various in different studies. During an Arctic smoke event at Zeppelin, an atypical weather pattern established a pathway for a rapid transport of BB aerosols from fires in Eastern Europe to the Arctic (Stohl et al., 2007). Pulimeno et al. (2024) focused on long-lasting events that exceeded the 50<sup>th</sup> percentile of light absorption coefficient in the reference month to differentiate extreme wildfire events from short-term variability in the measurements. Observations of AAE above 1.0 supported by chemical composition was used for characterization of the impact of North American intense fires upon the European Arctic (Markowicz et al., 2016). Popovicheva et al. (2022) assumed pollution episodes to be repeated events of eBC concentrations higher than the 80<sup>th</sup> percentile. Here, we focus on the events of the record high BC pollution level occurred at a monthly level. February 2022 was month with the highest concentrations in the cold period and August 2021 was characterised by unprecedented high smoke in the warm period; both, they are chosen for a case study here.

In February 2022, the timeseries of eBC concentration showed a high variability from 3 to 369 ng m<sup>-3</sup> (**Figure S 5a**). FLEXPART overestimated surface BC values by 178 ng m<sup>-3</sup>, on average. Looking closely to specific episodes, two peaks of high eBC concentrations were observed (**Figure S 5b**). On 3 February at 12:00 to 16:00, eBC reached 310 and 369 ng m<sup>-3</sup>, respectively, while FLEXPART simulated overestimated BC values of 1100 and 980 ng m<sup>-3</sup> at 00:00 and 13:00 (3 February), respectively. Spatial distribution of anthropogenic contributions showed that gas flaring regions at KMAO and YNAO were the highest (**Figure S 5c**) with 54% contribution to surface BC. AAE<sub>370/520</sub> values between 0.7 and 1.1 confirmed the anthropogenic source impact of the transported aerosols.

In August 2021, the second hottest August (14.9°C) during a 43-year NCEP-DOE reanalysis record (1979–2021) was observed in central Yakutia (Tomshin and Solovyev, 2022). Intensification of wildfires associated with positive temperature anomalies and persistent high-pressure systems promoted dry weather conditions by blocking the transport of moist air masses from the European part of Russia. Since the beginning of August the eBC concentrations at Island Bely were very low, around the arctic background defined in Popovicheva et al. (2022) as 10 ng m<sup>-3</sup>. Smoke started with a sharp increase at 9:00 on 5 August and lasted until 6:00 on 7 August (**Figure S 6**). Unprecedented high wildfire-related smoke characterized by a large peak and a long duration averaged babsBrC contribution to total babs(370) of 50% and 20% (**Figure S 6**). Calculation of babsBC and babsBrC during events shows the apparent dominance of BC absorption (**Figure S 6**). This is mainly because the mass of OC was ~35 times higher than the mass of EC. AAE<sub>370/520</sub> approached 1.7 on 7 August (**Figure S 6b**), the characteristic of aged BB plume with elevated BrC light absorbers in transported smoke aerosols. The weekly average of AAE<sub>405/808</sub> accounted for 1-1.2, indicating intense atmospheric aging and degradation of BrC chromophores from the wildfire plume (Schneider et al., 2024). FLEXPART model captures this event well, simulates the variability but overestimates surface BC, by up to 6200 ng m<sup>-3</sup> at the peak value (**Figure S 6**). The reason might be use of increased emission factors for BC during Yakutian wildfires in the adopted CAMS GFAS emissions. Notably, air masses of 6-9 day aging contribute 71% whereas the shorter 3-6 days only 18%.

## References

- Markowicz, K.M., Pakszys, P., Ritter, C., Zielinski, T., Udisti, R., Cappelletti, D., Mazzola, M., Shiobara, M., Xian, P., Zawadzka, O., Lisok, J., Petelski, T., Makuch, P., Karasinski, G., 2016. Impact of North American intense fires on aerosol optical properties measured over the European Arctic in July 2015. *J. Geophys. Res.* 121, 14487–14512. <https://doi.org/10.1002/2016JD025310>
- Popovicheva, O.B., Evangeliou, N., Kobelev, V.O., Chichaeva, M.A., Eleftheriadis, K., Gregorič, A., Kasimov, N.S., 2022. Siberian Arctic black carbon: gas flaring and wildfire impact. *Atmos. Chem. Phys.* 22, 5983–6000. <https://doi.org/10.5194/acp-22-5983-2022>
- Pulimeno, S., Bruschi, F., Feltracco, M., Mazzola, M., Gilardoni, S., Crocchianti, S., Cappelletti, D., Gambaro, A., Barbaro, E., 2024. Investigating the Presence of Biomass Burning Events at Ny-Å Lesund: Optical and Chemical Insights from Summer-Fall 2019. *Atmos. Environ.* 320, 120336. <https://doi.org/10.1016/j.atmosenv.2024.120336>
- Schneider, E., Czech, H., Popovicheva, O., Chichaeva, M., Kobelev, V., Kasimov, N., Minkina, T., Rüger, C.P., Zimmermann, R., 2024. Mass spectrometric analysis of unprecedented high levels of carbonaceous aerosol particles long-range transported from wildfires in the Siberian Arctic. *Atmos. Chem. Phys.* 24, 553–576. <https://doi.org/10.5194/acp-24-553-2024>
- Stohl, A., Berg, T., Burkhardt, J.F., Fjærraa, A.M., Forster, C., Herber, A., Hov, Ø., Lunder, C., McMillan, W.W., Oltmans, S., Shiobara, M., Simpson, D., Solberg, S., Stebel, K., Ström, J., Tørseth, K., Treffeisen, R., Virkkunen, K., Yttri, K.E., 2007. Arctic smoke – record high air pollution levels in the European Arctic due to agricultural fires in Eastern Europe in spring 2006. *Atmos. Chem. Phys.* 7, 511–534. <https://doi.org/10.5194/acp-7-511-2007>
- Tomshin, O., Solovyev, V., 2022. Features of the Extreme Fire Season of 2021 in Yakutia (Eastern Siberia) and Heavy Air Pollution Caused by Biomass Burning. *Remote Sens.* 14. <https://doi.org/10.3390/rs14194980>
